# Supplementary material for: Characterization and Action Mechanism Analysis of VvmiR156b/c/d-VvSPL9 Module Responding to Multiple-Hormone Signals in the Modulation of Grape Berry Color Formation
Source: MDPI journal article supplement (doi:10.3390/foods10040896), 2021-04-19
Supplement: s1 [file s1]

## Supplementary Material

**Table S1.** The cloning primers of VvmiR156b/c/d and *VvSPL9*.

| Primer name | Forward primer sequences (5'-3')                      | Reverse primer sequences (5'-3')                          | Use             |
|-------------|-------------------------------------------------------|-----------------------------------------------------------|-----------------|
| VvmiR156b   | CATGCCATGGGTAGCAGAGAGAGACCGG<br>AGCTT                 | GACTAGTCTCTCTTTTCATTTTAAAGTCGCTCT                         | VvmiR156b clone |
| VvmiR156c   | CATGCCATGGCACTTGAGAGATGAGACT<br>CAAACCTG              | GACTAGTCTCACATTTTATCCAATGTCCA                             | VvmiR156c clone |
| VvmiR156d   | CATGCCATGGCCGGAGAGGGGAGGGGAAC<br>TGAAC                | GACTAGTAGTGTGAGGCTTTGGGGGGATTATG                          | VvmiR156d clone |
| VvSPL9      | ACACGGGGGACTCTTGACCATGGTAGAT<br>CTATGGAAAGGGGTTCGAGCT | TCCAGTGAAAAGTTCTTCTCCTTTACTAGTCT<br>AAAGTGACCAGTGCATCTGCT | VvSPL9 clone    |

**Table S2** The cloning primers of VvmiR156b/c/d and *VvSPL9* promoters.

| Primer name   | Primer sequence                                      | Primer use                          |
|---------------|------------------------------------------------------|-------------------------------------|
| P-VvmiR156b-F | CAGCTATGACCATGATTACGCCAAGCTTCTGGATTTGACACAAGATTGGA   | Amplification of VvmiR156b promoter |
| P-VvmiR156b-R | ACATAAGGGACTGACCACCCGGGGATCCTGCCCCAGAAGAAGAAGAAAG    |                                     |
| P-VvmiR156c-F | CAGCTATGACCATGATTACGCCAAGCTTACTCCCCTCATCTCCCACTCT    | Amplification of VvmiR156c promoter |
| P-VvmiR156c-R | ACATAAGGGACTGACCACCCGGGGATCCACCATTTGTAACCCCATACAAACA |                                     |
| P-VvmiR156d-F | CAGCTATGACCATGATTACGCCAAGCTTGACAATGATACGGCCATTGA     | Amplification of VvmiR156d promoter |
| P-VvmiR156d-R | ACATAAGGGACTGACCACCCGGGGATCCCGTCTCCCTCTTATCTTCGC     |                                     |

**Table S3** Quantitative primers of VvmiR156b/c/d and *VvSPL9*.

| Primer name  | Primer sequence       | Primer use            |
|--------------|-----------------------|-----------------------|
| qVvmiR156b-F | TTGGACTTCAACACCCAACA  | qRT-PCR for VvmiR156b |
| qVvmiR156b-R | TTCTTCTTCTGGGGCACATT  |                       |
| qVvmiR156c-F | GCAGCTCCTTCTGTTCCATC  | qRT-PCR for VvmiR156c |
| qVvmiR156c-R | CATGGTCTGTTCTTGCATGG  |                       |
| qVvmiR156d-F | GAGAGGGAGGGGAACCTGAAC | qRT-PCR for VvmiR156d |
| qVvmiR156d-R | CTCATCCCTTCTGCTTCTGC  |                       |
| qVvSPL9-F    | TTCGAGCTCTTTGACCGTTT  | qRT-PCR for VvSPL9    |
| qVvSPL9-R    | CTCCCTGAACAACCCCACTA  |                       |

**Table S4** Quantitative primers for anthocyanin synthesis genes of grape.

| Primer name | Primer sequence       | Primer use        |
|-------------|-----------------------|-------------------|
| qVvPAL-F    | CATCGAACGGGAGATCAACT  | qRT-PCR for VvPAL |
| qVvPAL-R    | TGATGGCAGTCCATTGTTGT  |                   |
| qVv4CL-F    | ACCACCTCCCTCTCCACAC   | qRT-PCR for Vv4CL |
| qVv4CL-R    | GCTCCGAGAAAGGAGAACG   |                   |
| qVvC4H-F    | CGTTGTTTCGTGAAGCTCAAA | qRT-PCR for VvC4H |
| qVvC4H-R    | GTCCTTGAAGAGCTGCAACC  |                   |
| qVvCHS-F    | GAAGATGGGAATGGCTGCTG  | qRT-PCR for VvCHS |
| qVvCHS-R    | AAGGCACAGGGACACAAAAG  |                   |
| qVvCHI-F    | TCCAGATCAAGTTCACAGCA  | qRT-PCR for VvCHI |
| qVvCHI-R    | GAAATAAGAGCCTCAAAGAA  |                   |
| qVvF3H-F    | CTGTGGTGAACCTCCGACTGC | qRT-PCR for VvF3H |
| qVvF3H-R    | CAAATGTTATGGGCTCCTCC  |                   |

|             |                           |                                 |
|-------------|---------------------------|---------------------------------|
| qVvF3'H-F   | GCCTCCGTTGCTGCTCAGTT      | qRT-PCR for VvF3'H              |
| qVvF3'H-R   | GAGAAGAGGTGGACGGAGCAAATC  |                                 |
| qVvF3'5'H-F | AAACCGCTCAGACCAAAACC      | qRT-PCR for VvF3'5'H            |
| qVvF3'5'H-R | ACTAAGCCACAGGAAACTAA      |                                 |
| qVvDFR-F    | GAAACCTGTAGATGGCAGGA      | qRT-PCR for VvDFR               |
| qVvDFR-R    | GGCCAAATCAAACCTACCAGA     |                                 |
| qVvLDOX-F   | AGGGAAGGGAACAAGTAG        | qRT-PCR for VvLDOX              |
| qVvLDOX-R   | ACTCTTTGGGGATTGACTGG      |                                 |
| qVvOMT-F    | CCAAGGTGTCGTCCATATC       | qRT-PCR for VvOMT               |
| qVvOMT-R    | GGAATTGAACTCGGCAGAAG      |                                 |
| qVvUFGT-F   | GGGATGGTAATGGCTGTGG       | qRT-PCR for VvUFGT              |
| qVvUFGT-R   | ACATGGGTGGAGAGTGAGTT      |                                 |
| qVvActin-F  | TACAATTCCATCATGAAGTGTGATG | Actin internal reference primer |
| qVvActin-R  | TTAGAAGCACTTCCTGTGAACAATG |                                 |

**Table S5** Quantitative primers for anthocyanin synthesis genes of tomato.

| Primer name | Primer sequence          | Primer use           |
|-------------|--------------------------|----------------------|
| qSly-CAC-F  | CCTCCGTTGTGATGTAACCTG    | qRT-PCR for Sly-CAC  |
| qSly-CAC-R  | ATTGGTGGAAAGTAACATCATC   |                      |
| qSly-PAL-F  | ATTGGGAAATGGCTGCTGATT    | qRT-PCR for Sly-PAL  |
| qSly-PAL-R  | TCAACATTTGCAATGGATGCA    |                      |
| qSly-CHS-F  | TGGTCACCGTGGAGGAGTATC    | qRT-PCR for Sly-CHS  |
| qSly-CHS-R  | GATCGTAGCTGGACCCCTCTGC   |                      |
| qSly-F3'H-F | GCACCACGAATGCACTTGC      | qRT-PCR for Sly-F3'H |
| qSly-F3'H-R | CGTTAGTACCGTCGGCGAAT     |                      |
| qSly-DFR-F  | CAAGGCAGAGGGAAGATTCATTTG | qRT-PCR for Sly-DFR  |
| qSly-DFR-R  | GCACCATCTTAGCCACATCGTA   |                      |
| qSly-3GT-F  | GCACATAAGAGTGTTGGCGTTT   | qRT-PCR for Sly-3GT  |
| qSly-3GT-R  | TTTCCAAACACTTTCCACCA     |                      |
| qSly-ANS-F  | GAAGTAGCACTTGGCGTCGAA    | qRT-PCR for Sly-ANS  |
| qSly-ANS-R  | TTGCAAGCCAGGCACCATA      |                      |
| qSly-SPL9-F | GGTGCCAAGTTGAAGGTTGT     | qRT-PCR for Sly-SPL9 |
| qSly-SPL9-R | CCCCTGGTCGAATTCAGTTA     |                      |

**Table S6** Volatile substances in ‘Wink’.

| Component Name                                                   | Retention Time | Reference m/z | BP Area   | Content (mg) | Content ratio | BP Height | TIC       | Formula (mol ion) | CAS No.    | SI  | RSI |
|------------------------------------------------------------------|----------------|---------------|-----------|--------------|---------------|-----------|-----------|-------------------|------------|-----|-----|
| 2-Hexenal                                                        | 5.752          | 41.039        | 125997816 | 1.06046E-06  | 9.97%         | 34209494  | 212616618 | C6H10O            | 505-57-7   | 957 | 958 |
| 3-Hexen-1-ol, (Z)-                                               | 5.899          | 41.039        | 88262562  | 7.42863E-07  | 6.98%         | 15684067  | 54390486  | C6H12O            | 928-96-1   | 830 | 835 |
| Formamide, N,N-dibutyl-                                          | 28.15          | 71.98         | 84637002  | 7.12348E-07  | 6.70%         | 17091297  | 48404241  | C9H19NO           | 761-65-9   | 834 | 834 |
| Benzaldehyde, 2,4-dimethyl-                                      | 23.818         | 133.062       | 76969388  | 6.47814E-07  | 6.09%         | 13955967  | 69529075  | C9H10O            | 15764-16-6 | 932 | 932 |
| Toluene                                                          | 3.488          | 91.062        | 74335451  | 6.25645E-07  | 5.88%         | 20112981  | 49714422  | C7H8              | 108-88-3   | 929 | 929 |
| 2-Buten-1-one, 1-(2,6,6-trimethyl-1,3-cyclohexadien-1-yl)-, (E)- | 32.148         | 69.088        | 63181465  | 5.31767E-07  | 5.00%         | 16062904  | 63290033  | C13H18O           | 23726-93-4 | 914 | 944 |
| 2-Heptenal, (Z)-                                                 | 10.531         | 41.039        | 63162446  | 5.31607E-07  | 5.00%         | 12171274  | 77558899  | C7H12O            | 57266-86-1 | 937 | 947 |
| 5,9-Undecadien-2-one, 6,10-dimethyl-, (E)-                       | 34.502         | 43.03         | 62407156  | 5.2525E-07   | 4.94%         | 21715195  | 78471942  | C13H22O           | 3796-70-1  | 897 | 897 |
| 2-Octenal, (E)-                                                  | 15.91          | 41.039        | 51865288  | 4.36525E-07  | 4.10%         | 11578850  | 82449267  | C8H14O            | 2548-87-0  | 869 | 869 |
| 1-Octen-3-one                                                    | 11.738         | 55.03         | 51817744  | 4.36125E-07  | 4.10%         | 8997180   | 28841507  | C8H14O            | 4312-99-6  | 873 | 883 |
| Trichloromethane                                                 | 1.925          | 83.055        | 40415625  | 3.40159E-07  | 3.20%         | 19332983  | 50728379  | CHCl3             | 67-66-3    | 940 | 940 |
| Hexanal                                                          | 4.136          | 41.039        | 39465304  | 3.3216E-07   | 3.12%         | 12394274  | 69551462  | C6H12O            | 66-25-1    | 886 | 886 |
| Nonanal                                                          | 18.385         | 57.063        | 34840153  | 2.93232E-07  | 2.76%         | 8883263   | 75489308  | C9H18O            | 124-19-6   | 938 | 938 |
| <b>Octanal</b>                                                   | 13.123         | 41.039        | 29406488  | 2.475E-07    | 2.33%         | 4121327   | 23434284  | C8H16O            | 124-13-0   | 835 | 835 |
| 3-Buten-2-one, 3-methyl-                                         | 2.288          | 41.039        | 27577779  | 2.32109E-07  | 2.18%         | 10135478  | 40840268  | C5H8O             | 814-78-8   | 912 | 912 |
| n-Propyl acetate                                                 | 2.683          | 43.03         | 25736155  | 2.16609E-07  | 2.04%         | 8704407   | 16157322  | C5H10O2           | 109-60-4   | 936 | 938 |
| Cyclopropane, propyl-                                            | 6.463          | 56.077        | 25321726  | 2.13121E-07  | 2.00%         | 4538826   | 14337615  | C6H12             | 2415-72-7  | 892 | 899 |
| 2,6-Octadiene, 2,6-dimethyl-                                     | 15.699         | 41.039        | 24077891  | 2.02652E-07  | 1.91%         | 5656647   | 24250016  | C10H18            | 2792-39-4  | 825 | 843 |
| Pentanal                                                         | 2.492          | 44.046        | 22267519  | 1.87415E-07  | 1.76%         | 8190054   | 26787576  | C5H10O            | 110-62-3   | 870 | 895 |

|                                                                                      |        |         |          |             |       |         |          |           |             |     |     |
|--------------------------------------------------------------------------------------|--------|---------|----------|-------------|-------|---------|----------|-----------|-------------|-----|-----|
| Tetradecane                                                                          | 32.839 | 57.063  | 20201072 | 1.70023E-07 | 1.60% | 5748057 | 28037470 | C14H30    | 629-59-4    | 890 | 891 |
| 1-Propanone, 1-cyclopropyl-                                                          | 3.539  | 41.039  | 18395435 | 1.54825E-07 | 1.46% | 5199460 | 15067304 | C6H10O    | 6704-19-4   | 863 | 877 |
| 1-Ethylhexyl propionate                                                              | 23.781 | 57.063  | 18363939 | 1.5456E-07  | 1.45% | 5156511 | 11029909 | C11H22O2  |             | 874 | 899 |
| 2-Propyl-1-pentanol                                                                  | 14.505 | 57.063  | 17647825 | 1.48533E-07 | 1.40% | 3642643 | 12675733 | C8H18O    | 58175-57-8  | 896 | 898 |
| Ethyl Acetate                                                                        | 1.905  | 43.03   | 12016625 | 1.01138E-07 | 0.95% | 3948904 | 7062476  | C4H8O2    | 141-78-6    | 878 | 878 |
| Decanal                                                                              | 23.553 | 41.039  | 11135666 | 9.37234E-08 | 0.88% | 2498923 | 24862351 | C10H20O   | 112-31-2    | 914 | 914 |
| 7-Oxabicyclo[4.1.0]heptane                                                           | 5.879  | 83.055  | 8701310  | 7.32347E-08 | 0.69% | 2070684 | 3390487  | C6H10O    | 286-20-4    | 911 | 911 |
| 2,4-Di-tert-butylphenol                                                              | 35.978 | 191.142 | 8683838  | 7.30876E-08 | 0.69% | 3410510 | 11749884 | C14H22O   | 96-76-4     | 917 | 918 |
| Phenylethyl Alcohol                                                                  | 18.791 | 91.062  | 7768862  | 6.53867E-08 | 0.61% | 795361  | 1884354  | C8H10O    | 22258       | 912 | 912 |
| p-Xylene                                                                             | 7.462  | 91.062  | 6413030  | 5.39753E-08 | 0.51% | 1022983 | 1794916  | C8H10     | 106-42-3    | 862 | 862 |
| Cyclopropane, pentyl-                                                                | 16.721 | 41.039  | 5241120  | 4.41119E-08 | 0.41% | 1209223 | 7604331  | C8H16     | 2511-91-3   | 847 | 859 |
| Pentadecane                                                                          | 35.686 | 57.063  | 4952291  | 4.1681E-08  | 0.39% | 1902668 | 9610062  | C15H32    | 629-62-9    | 900 | 901 |
| Diethyltoluamide                                                                     | 37.312 | 119.03  | 4940193  | 4.15792E-08 | 0.39% | 1590855 | 4105828  | C12H17NO  | 134-62-3    | 920 | 922 |
| trans-2-Nonenal                                                                      | 21.219 | 41.039  | 4875490  | 4.10346E-08 | 0.39% | 1063465 | 8757090  | C9H16O    |             | 920 | 922 |
| 2-Undecenal                                                                          | 31.142 | 41.039  | 4552501  | 3.83162E-08 | 0.36% | 811170  | 6863181  | C11H20O   | 2463-77-6   | 868 | 869 |
| 2-Decenal, (Z)-                                                                      | 26.249 | 41.039  | 4473326  | 3.76498E-08 | 0.35% | 991011  | 9331213  | C10H18O   | 2497-25-8   | 922 | 926 |
| 2(3H)-Furanone, 5-acetyldihydro-                                                     | 15.668 | 84.946  | 4296923  | 3.61651E-08 | 0.34% | 1275887 | 3238289  | C6H8O3    | 29393-32-6  | 815 | 878 |
| Benzeneacetaldehyde                                                                  | 15.172 | 91.062  | 3801711  | 3.19971E-08 | 0.30% | 404950  | 740491   | C8H8O     | 122-78-1    | 865 | 892 |
| Cyclohexanol, 5-methyl-2-(1-methylethyl)-, (1.alpha.,2.beta.,5.alpha.)-( $\alpha$ )- | 21.826 | 71.093  | 3800843  | 3.19898E-08 | 0.30% | 628145  | 4828509  | C10H20O   | 15356-70-4  | 885 | 885 |
| Linalool                                                                             | 18.177 | 71.093  | 3554353  | 2.99152E-08 | 0.28% | 739385  | 5440785  | C10H18O   | 78-70-6     | 858 | 858 |
| Benzaldehyde                                                                         | 10.722 | 77.037  | 3538019  | 2.97778E-08 | 0.28% | 294101  | 807286   | C7H6O     | 100-52-7    | 837 | 837 |
| 1-Butanol, 3-methyl-                                                                 | 2.938  | 55.03   | 3448746  | 2.90264E-08 | 0.27% | 1138350 | 5811306  | C5H12O    | 123-51-3    | 912 | 912 |
| Tridecane                                                                            | 23.318 | 57.063  | 3396541  | 2.8587E-08  | 0.27% | 742599  | 3388291  | C13H28    | 629-50-5    | 835 | 854 |
| Ethylbenzene                                                                         | 6.141  | 91.062  | 3351464  | 2.82076E-08 | 0.27% | 626252  | 1266307  | C8H10     | 100-41-4    | 868 | 876 |
| Heptanal                                                                             | 7.902  | 41.039  | 3289777  | 2.76884E-08 | 0.26% | 704199  | 4462370  | C7H14O    | 111-71-7    | 852 | 852 |
| 2-Propenoic acid, oxiranylmethyl ester                                               | 2.412  | 55.03   | 3223534  | 2.71309E-08 | 0.26% | 1064045 | 1231080  | C6H8O3    | 106-90-1    | 874 | 874 |
| 3-Tetradecene, (Z)-                                                                  | 32.524 | 55.03   | 3122475  | 2.62803E-08 | 0.25% | 699388  | 5193984  | C14H28    | 41446-67-7  | 890 | 893 |
| Nitrogen fluoride, (E)-                                                              | 12.734 | 66.073  | 3099237  | 2.60848E-08 | 0.25% | 712617  | 827011   | F2N2      | 13776-62-0  | 856 | 999 |
| 3-Tetradecene, (Z)-                                                                  | 22.889 | 41.039  | 3019835  | 2.54165E-08 | 0.24% | 735828  | 6597666  | C14H28    | 41446-67-7  | 927 | 928 |
| Pyrimidine-2,4(1H,3H)-dione, 5-amino-6-nitroso-                                      | 1.811  | 43.03   | 2765388  | 2.32749E-08 | 0.22% | 553550  | 911199   | C4H4N4O3  |             | 823 | 902 |
| Phthalic acid, hex-3-yl isobutyl ester                                               | 41.404 | 149.015 | 2563642  | 2.15769E-08 | 0.20% | 1009310 | 2027685  | C18H26O4  |             | 901 | 904 |
| Dibutyl phthalate                                                                    | 42.467 | 149.015 | 2466218  | 2.07569E-08 | 0.20% | 940159  | 1880187  | C16H22O4  | 84-74-2     | 897 | 907 |
| Propanoic acid, 2-methyl-, 3-hydroxy-2,2,4-trimethylpentyl ester                     | 31.585 | 71.093  | 2361813  | 1.98782E-08 | 0.19% | 374859  | 1339054  | C12H24O3  | 77-68-9     | 806 | 811 |
| Undecane, 4,7-dimethyl-                                                              | 27.188 | 71.093  | 2324283  | 1.95624E-08 | 0.18% | 535098  | 2329513  | C13H28    | 17301-32-5  | 883 | 885 |
| 1-Pentanol                                                                           | 3.482  | 41.039  | 2305126  | 1.94011E-08 | 0.18% | 1039979 | 4177584  | C5H12O    | 71-41-0     | 827 | 844 |
| 3-Buten-2-one, 4-(2,6,6-trimethyl-1-cyclohexen-1-yl)-                                | 35.374 | 177.132 | 2154594  | 1.81342E-08 | 0.17% | 757255  | 3678963  | C13H20O   | 14901-07-6  | 865 | 865 |
| Hexane, 2,2,5-trimethyl-                                                             | 26.846 | 71.093  | 2027181  | 1.70618E-08 | 0.16% | 273831  | 367046   | C9H20     | 3522-94-9   | 937 | 942 |
| 1,2,4-Triazin-5(4H)-one, 3,4-diamino-6-methyl-                                       | 10.571 | 141.06  | 1892690  | 1.59298E-08 | 0.15% | 380924  | 918562   | C4H7N5O   | 52553-11-4  | 845 | 845 |
| Pentane, 1-chloro-                                                                   | 3.264  | 42.032  | 1843712  | 1.55176E-08 | 0.15% | 570967  | 2822340  | C5H11Cl   | 543-59-9    | 899 | 899 |
| Hexane, 2,2,5-trimethyl-                                                             | 31.185 | 71.093  | 1789429  | 1.50607E-08 | 0.14% | 263507  | 386526   | C9H20     | 3522-94-9   | 816 | 940 |
| Cyclopropane, 1,1'-methylenebis-                                                     | 31.953 | 68.115  | 1739926  | 1.46441E-08 | 0.14% | 278101  | 342009   | C7H12     | 5685-47-2   | 856 | 874 |
| Hexadecanoic acid, ethyl ester                                                       | 42.715 | 88.065  | 1725762  | 1.45249E-08 | 0.14% | 682582  | 3320591  | C18H36O2  | 628-97-7    | 834 | 834 |
| 3-Hydroxy-3-phenylbutan-2-one                                                        | 17.372 | 43.03   | 1547419  | 1.30239E-08 | 0.12% | 325037  | 704456   | C10H12O2  | 458389      | 814 | 830 |
| Sulphuric acid dibutyl ester                                                         | 2.992  | 41.039  | 1526116  | 1.28446E-08 | 0.12% | 468373  | 1015003  | C8H18O4S  | 625-22-9    | 801 | 804 |
| Decane, 2,3,5,8-tetramethyl-                                                         | 34.77  | 57.063  | 1422240  | 1.19703E-08 | 0.11% | 434794  | 2117472  | C14H30    | 192823-15-7 | 828 | 830 |
| Propanedioic acid, propyl-                                                           | 22.081 | 60.073  | 1410373  | 1.18704E-08 | 0.11% | 244771  | 715534   | C6H10O4   | 616-62-6    | 868 | 874 |
| Naphthalene, 1,2,3,4-tetrahydro-1,1,6-trimethyl-                                     | 23.707 | 159.118 | 1362600  | 1.14683E-08 | 0.11% | 279973  | 750748   | C13H18    | 475-03-6    | 848 | 852 |
| Sulfurous acid, 2-ethylhexyl hexyl ester                                             | 35.602 | 57.063  | 1347453  | 1.13409E-08 | 0.11% | 538269  | 3174168  | C14H30O3S |             | 820 | 845 |
| Cyclopropane, nonyl-                                                                 | 35.069 | 55.03   | 1194111  | 1.00502E-08 | 0.09% | 404726  | 3721268  | C12H24    | 74663-85-7  | 847 | 852 |
| Heptadecane, 2,6-dimethyl-                                                           | 39.177 | 57.063  | 1141476  | 9.60724E-09 | 0.09% | 503149  | 2369372  | C19H40    | 54105-67-8  | 819 | 822 |

|                                                                             |        |         |         |             |       |        |         |            |            |     |     |
|-----------------------------------------------------------------------------|--------|---------|---------|-------------|-------|--------|---------|------------|------------|-----|-----|
| Methacrolein                                                                | 1.731  | 38.991  | 1131150 | 9.52034E-09 | 0.09% | 494044 | 1447273 | C4H6O      | 78-85-3    | 874 | 874 |
| Propene                                                                     | 12.107 | 41.039  | 1111312 | 9.35337E-09 | 0.09% | 436401 | 1013881 | C3H6       | 115-07-1   | 807 | 899 |
| N-Benzyloxy-2-carbomethoxyaziridine                                         | 15.397 | 91.062  | 1018944 | 8.57595E-09 | 0.08% | 189573 | 261956  | C11H13NO3  | 53084-33-6 | 838 | 856 |
| Diphenylamine                                                               | 38.057 | 169.113 | 980888  | 8.25565E-09 | 0.08% | 280960 | 986396  | C12H11N    | 122-39-4   | 900 | 915 |
| Octane, 2,2,6-trimethyl-2-(1H-Imidazol-1-yl)acetohydrazide                  | 36.558 | 71.093  | 843181  | 7.09664E-09 | 0.07% | 293069 | 689284  | C11H24     | 62016-28-8 | 818 | 839 |
| Heptane, 2,2-dimethyl-1H-Indene, 1-methylene-3,4-Diamino-1,2,4(4H)-triazole | 14.636 | 82.132  | 821457  | 6.9138E-09  | 0.06% | 171321 | 299978  | C5H8N4O    | 56563-00-9 | 826 | 876 |
| Heptane, 2,2-dimethyl-1H-Indene, 1-methylene-3,4-Diamino-1,2,4(4H)-triazole | 27.852 | 71.093  | 754738  | 6.35226E-09 | 0.06% | 145861 | 284595  | C9H20      | 1071-26-7  | 818 | 824 |
| Heptane, 2,2-dimethyl-1H-Indene, 1-methylene-3,4-Diamino-1,2,4(4H)-triazole | 22.201 | 128.076 | 695946  | 5.85744E-09 | 0.06% | 211990 | 323041  | C10H8      | 2471-84-3  | 940 | 959 |
| Heptane, 2,2-dimethyl-1H-Indene, 1-methylene-3,4-Diamino-1,2,4(4H)-triazole | 25.424 | 43.03   | 538274  | 4.53039E-09 | 0.04% | 155606 | 248808  | C2H5N5     | 38104-45-9 | 820 | 852 |
| Benzophenone                                                                | 38.191 | 105.072 | 502884  | 4.23253E-09 | 0.04% | 122103 | 437218  | C13H10O    | 119-61-9   | 799 | 823 |
| Methane, diethoxy-Cyclotrisiloxane, hexamethyl-                             | 2.298  | 59.031  | 485925  | 4.08979E-09 | 0.04% | 211914 | 363137  | C5H12O2    | 462-95-3   | 937 | 937 |
| 3-Octadecene, (E)-Methylene chloride                                        | 4.766  | 207.04  | 422545  | 3.55635E-09 | 0.03% | 131233 | 200185  | C6H18O3Si3 | 541-05-9   | 839 | 839 |
| 3-Octadecene, (E)-Methylene chloride                                        | 37.5   | 57.063  | 340052  | 2.86205E-09 | 0.03% | 130683 | 1258199 | C18H36     | 7206-19-1  | 880 | 880 |
| 3-Octadecene, (E)-Methylene chloride                                        | 1.617  | 48.982  | 299802  | 2.52329E-09 | 0.02% | 133507 | 356185  | CH2Cl2     | 27639      | 888 | 888 |

**Table S7** Classification and functional analysis of promoter of VvmiR156b/c/d.

| VvmiR156b                  | SUMNUM | ELEMENTS       | FUCTIONS                                                          |
|----------------------------|--------|----------------|-------------------------------------------------------------------|
| Light-related elements     | 13     | 2 Box 4        | part of a conserved DNA module involved in light responsiveness   |
|                            |        | 1 G-Box        | cis-acting regulatory element involved in light responsiveness    |
|                            |        | 3 G-box        | cis-acting regulatory element involved in light responsiveness    |
|                            |        | 2 GT1-motif    | light responsive element                                          |
|                            |        | 2 Sp1          | light responsive element                                          |
|                            |        | 3 TCT-motif    | part of a light responsive element                                |
| Hormone-related elements   | 11     | 5 ABRE         | cis-acting element involved in the abscisic acid responsiveness   |
|                            |        | 1 CGTCA-motif1 | cis-acting regulatory element involved in the MeJA-responsiveness |
|                            |        | 1 GARE-motif   | gibberellin-responsive element                                    |
|                            |        | 1 P-box        | gibberellin-responsive element                                    |
|                            |        | 1 TATC-box     | cis-acting element involved in gibberellin-responsiveness         |
|                            |        | 1 TCA-element  | cis-acting element involved in salicylic acid responsiveness      |
| Stress-related elements    | 1      | 1 TGACG-motif  | cis-acting regulatory element involved in the MeJA-responsiveness |
| Circadian-related elements | 1      | 1 LTR          | cis-acting element involved in low-temperature responsiveness     |
|                            |        | 1 circadian    | cis-acting regulatory element involved in circadian control       |

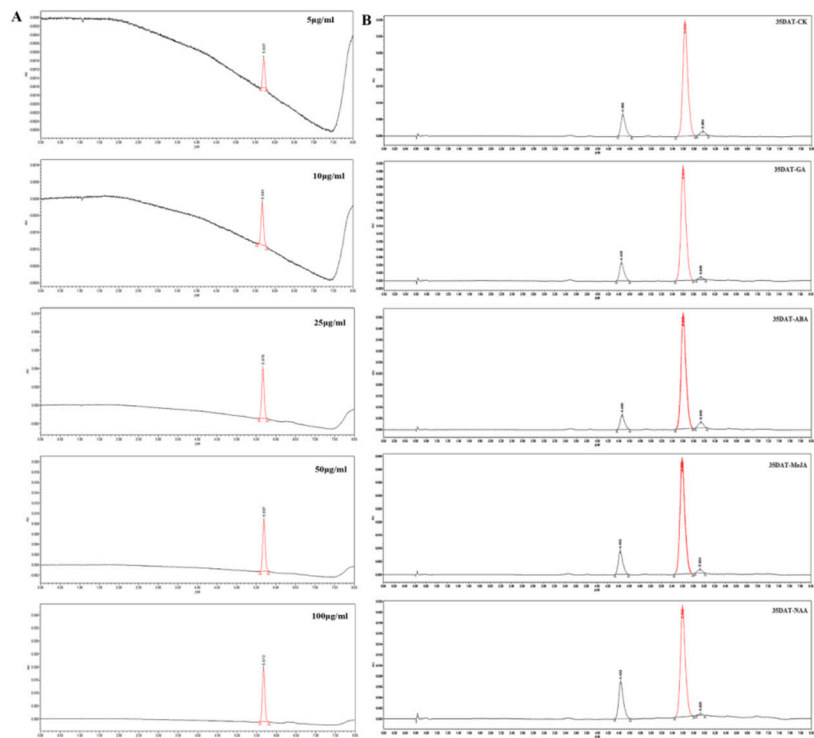

**Figure S1** HPLC chromatogram of anthocyanins standard sample (Cyanidin-3-O-glucoside chloride).

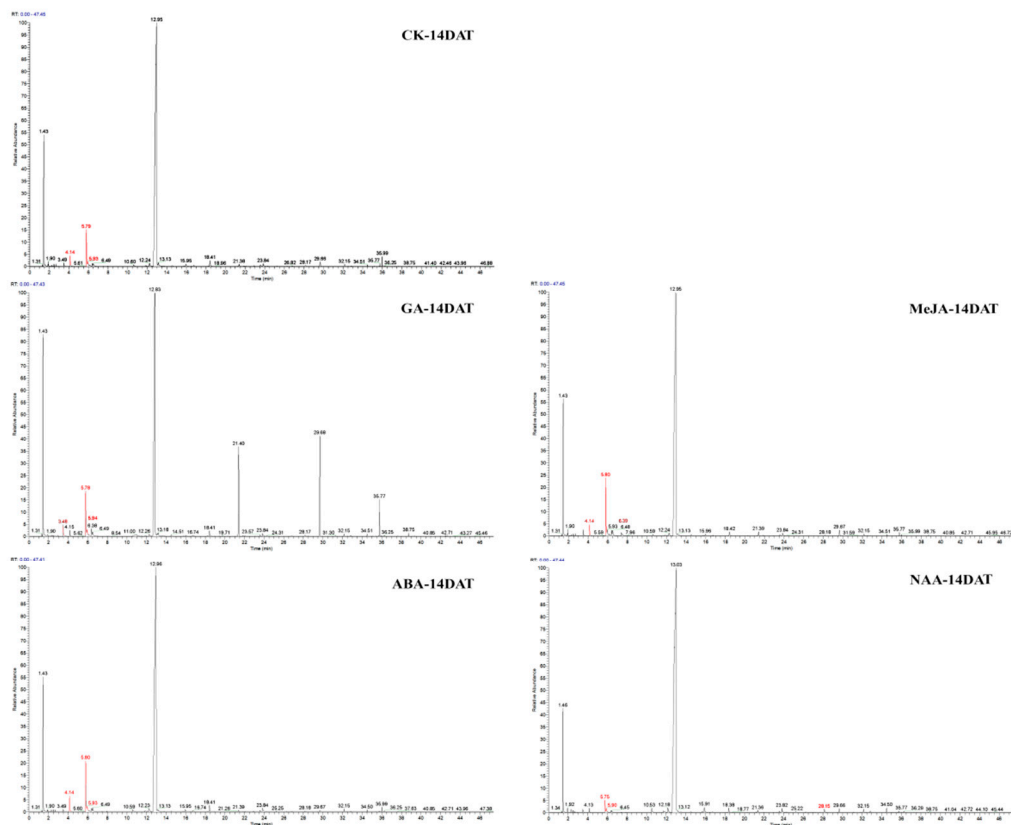

**Figure S2** GC-MS chromatogram of 'Wink' berry flesh

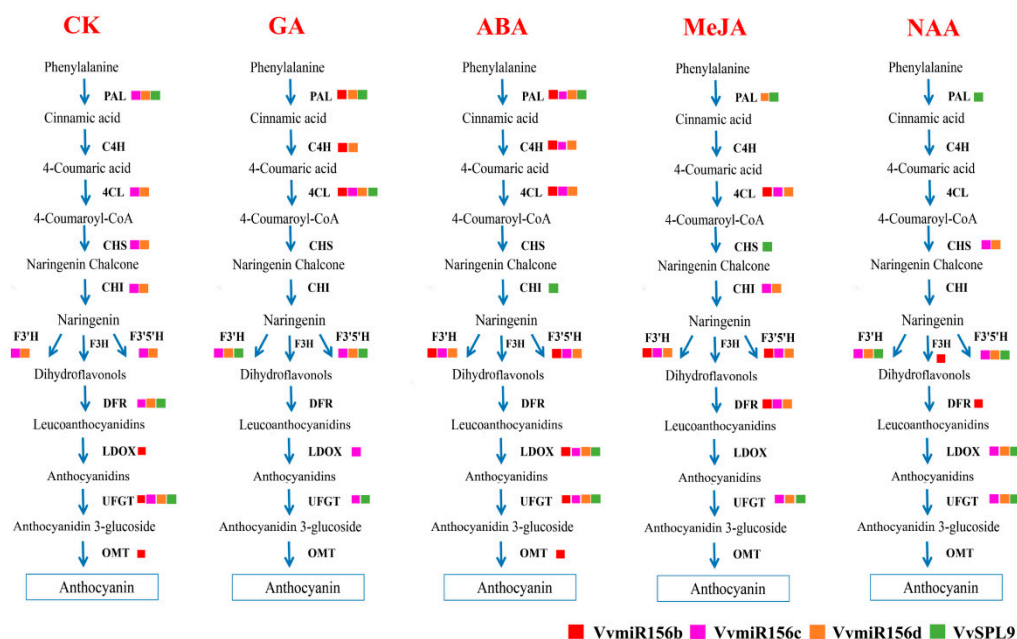

**Figure S3** The correlation analysis of VvmiR156b/c/d-*VvSPL9* and anthocyanin synthesis-related genes in response to hormone signal. The red, purple and orange boxes represent the positive correlation of VvmiR156b/c/d, and the green box represents the negative correlation of *VvSPL9*. The larger the box, the stronger the correlation.
